# Supplementary material for: yaaJ, the tRNA-Specific Adenosine Deaminase, Is Dispensable in Bacillus subtilis
Source: MDPI journal article supplement (doi:10.3390/genes14081515), 2023-07-25
Supplement: s1 [file s1]

Supplementary Materials:

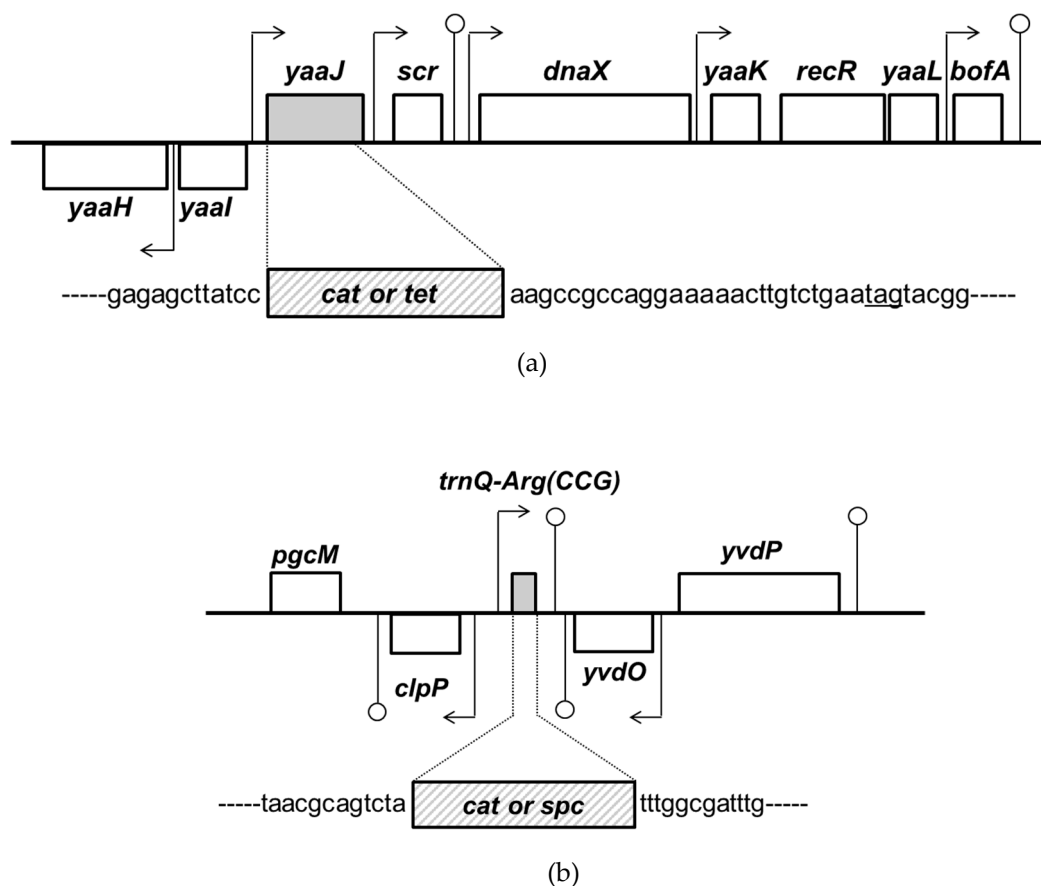

**Figure S1.** Genetic maps of the *B. subtilis yaaJ*- and *trnQ-Arg(CCG)*-deletion mutants. Detailed protocols for the construction of mutants are described in the Materials and Methods. Genes encoding for (a) *yaaJ* and (b) *trnQ-Arg(CCG)* genes are shown by gray boxes. The predicted promoters and the terminators are shown by bars with arrows and circles, respectively. The junction points created by the introduction of the antibiotic-resistant gene are shown by the dotted lines. The stop codon of *yaaJ* is underlined.

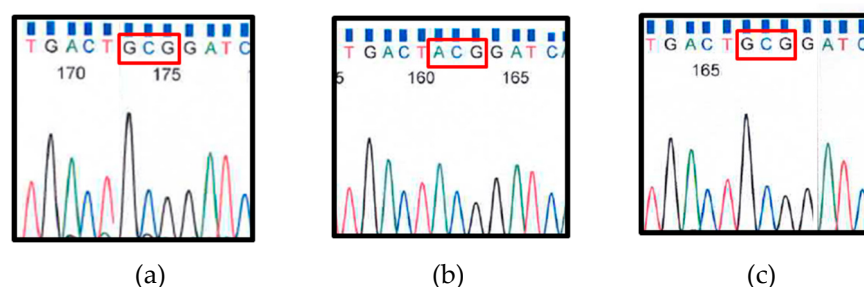

**Figure S2.** Detection of inosine modification in the anticodon of tRNA<sup>Arg</sup>(I/ACG) by DNA sequencing analysis of RT-PCR products. Sequencing analyses of tRNA<sup>Arg</sup>(I/ACG) from (a) the wild-type (strain 168), (b) the *yaaJ*-deletion mutant (KUB10), and (c) the *trnQ-Arg(CCG)*-deletion mutant (SOM1) strains. The nucleotides of the anticodon are indicated. 5'- and RT'-primers used for RT-PCR are listed in Fig. S1.

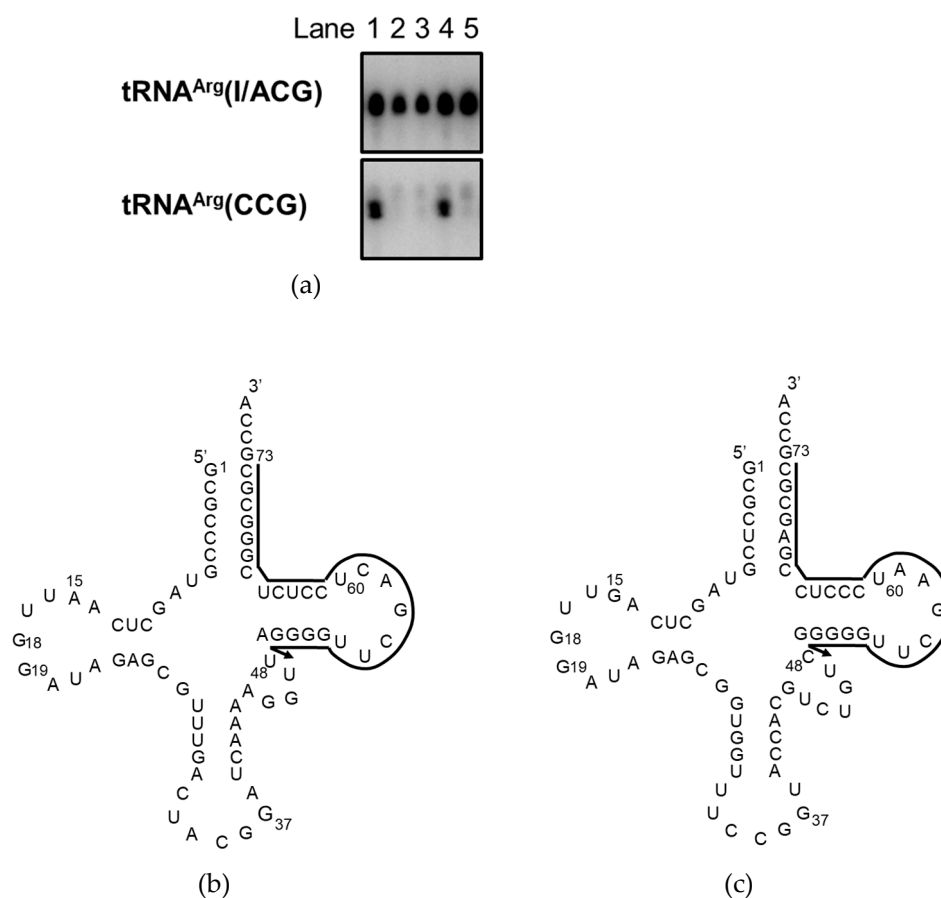

**Figure S3.** Northern blot analysis of *B. subtilis* *tRNA<sup>Arg</sup>(I/ACG)* and *tRNA<sup>Arg</sup>(CCG)*. (a) The expression of *tRNA<sup>Arg</sup>(I/ACG)* and *tRNA<sup>Arg</sup>(CCG)* was detected by probes complementary to the 3'-half of each tRNA, as indicated in (b) and (c). Crude RNA from the wild-type (strain 168 in lane 1), *trnQ-Arg(CCG)*-deletion mutant (SOM1 and SOM3 in lanes 2 and 3, respectively), *yaa*-deletion mutant (KUB10 in lane 4), and the double-deletion mutant of *tRNA<sup>Arg</sup>(CCG)* and *yaa* (SOM2 in lane 5) strains. The numbering of the tRNA positions follows the reference [1].

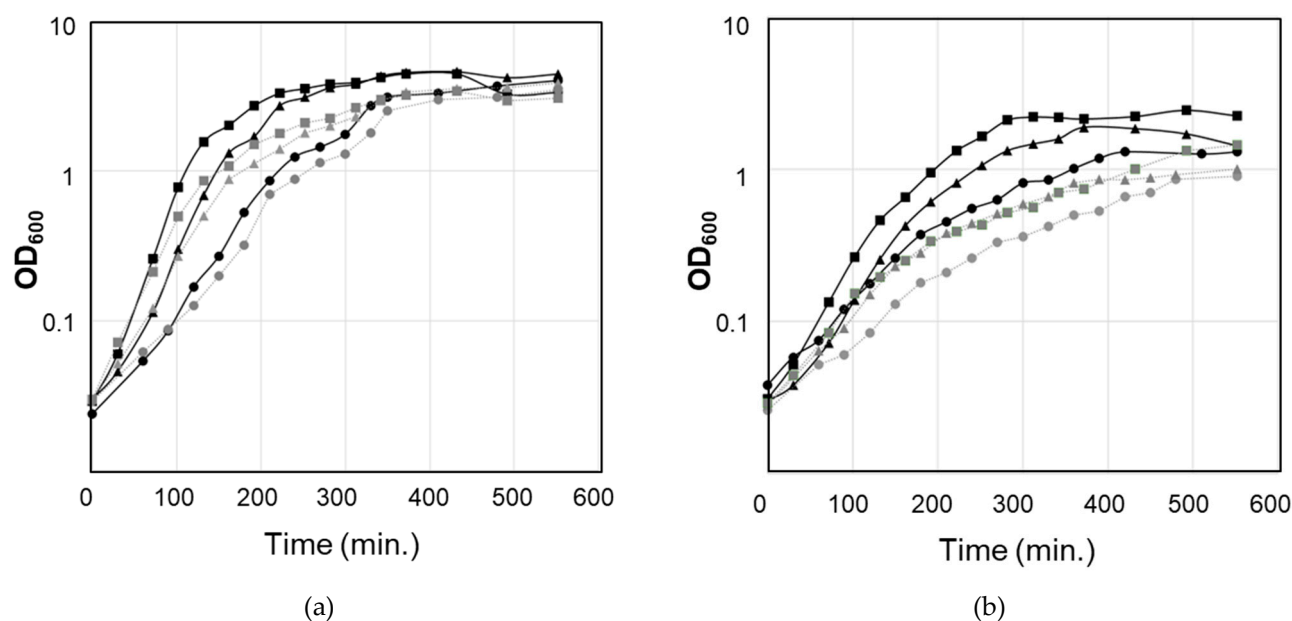

**Figure S4.** Growth of *B. subtilis* strains under various culture conditions.

Growth of the wild-type (strain 168; solid black line) and the *yaaJ*-deletion mutant (KUB10; dashed gray line) in (a) the rich (LB) and (b) poor medium (CSM [2]) at 30°C (circles), 37°C (triangles) and 45°C (squares).

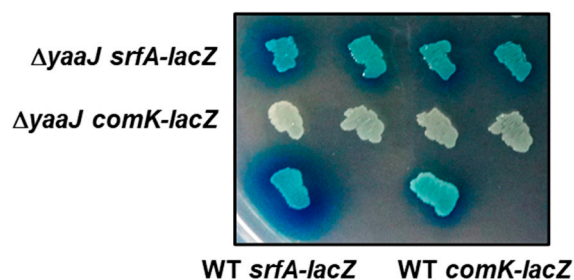

**Figure S5.** X-gal plate assay of *srfA* or *comK*-induced *lacZ* translation.

Wild-type (strain 168, bottom) and *yaaJ*-deletion mutant strains (KUB10, top and middle, 4 clones each) with the *srfA-lacZ* or *comK-lacZ* [3] in which the regulatory region and the first six codons (not arginine codons) of *comK* or *srfA* were fused to the N-terminus of *lacZ* were grown on the CI medium containing 40 µg/ml X-gal at 37°C.

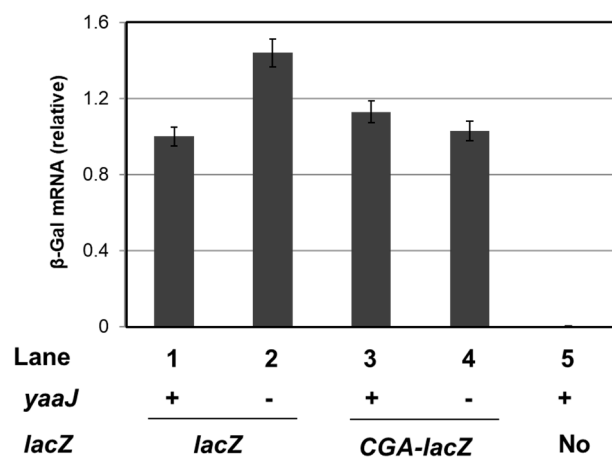

**Figure S6.** Real-time PCR analysis of  $\beta$ -gal mRNA in wild-type and KUB10 strains. The relative amount of unmodified and tandem CGA-containing  $\beta$ -gal mRNA in the wild-type (strain 168) and *yaaJ*-deletion mutant (KUB10) strains are shown.

**Table S1.** Primers and probes used in this study.

| Primer name            | Sequences (5'→3')                                     | Relevant materials   |
|------------------------|-------------------------------------------------------|----------------------|
| yaaJ up5'-1            | CATTCTCCATCATGGTTAAGGCGA                              | KUB10                |
| yaaJ up3'-1            | GCCTCCTAAATTTTATCTAAAGTGGGAT<br>AAGCTCTCTTTTCAAAGTT   | KUB10                |
| yaaJ dwn5'-1           | TAATGACTGGCTTTTATAATATGAGAAGC<br>CGCCAGGAAAAACTTGTCTG | KUB10                |
| yaaJ dwn3'             | TTTGTAATGTGTTCTTGTCCGACC                              | KUB10, SOM2          |
| yaaJ up5'-2            | GTATTGAACTGCCGGGCGATG                                 | SOM2                 |
| yaaJ up3'-2            | AACAATATGGCCCGTTTGTGAACTGGAT<br>AAGCTCTCTTTTCAA       | SOM2                 |
| yaaJ dwn5'-2           | CTCAAAGGGATTTCTAAATCGTTAAAAG<br>CCGCCAGGAAAAACTTGTCTG | SOM2                 |
| trnQ-Arg(CCG)up5'-p    | CGCCGGCTGCAAGCAGGAACGCGC                              | SOM1-3               |
| trnQ-Arg(CCG)up3'-p-1  | GCCTCCTAAATTTTATCTAAAGTG<br>TAGACTGCGTTATGAGAACGTCAG  | SOM1, SOM3           |
| trnQ-Arg(CCG)dwn5'-p-1 | TAATGACTGGCTTTTATAATATGAGTTTG<br>GCGATTTGCCGCTCTTGTCT | SOM1, SOM3           |
| trnQ-Arg(CCG)dwn3'-p   | GAACAGGTGAAGCCCCGACTCGGT                              | SOM1-3               |
| trnQ-Arg(CCG)up3'-p-2  | CATGTATTCACGAACGAAAATCGATTAG<br>ACTGCGTTATGAGAACGTCAG | SOM2                 |
| trnQ-Arg(CCG)dwn5'-p-2 | AAATTGAAAAAATGGTGGAACACTTTG<br>GCGATTTGCCGCTCTTGTCT   | SOM3                 |
| cat5'p                 | CAC TT TAGATAAAAA TTTAGGAGGC                          | KUB10, SOM1,<br>SOM2 |
| cat3'p                 | TTATAAAAGCCAGTCATTAGGCCTA                             | KUB10, SOM1,<br>SOM2 |
| spc5'p                 | ATCGATTTTCGTTTCGTGAATACATG                            | SOM3                 |
| spc3'p                 | GTGTTTCCACCATTTTTCATTT                                | SOM3                 |
| tet5'p                 | AGTTCAACAAACGGGCCATA                                  | SOM2                 |
| tet3'p                 | TTAACGATTTAGAAATCCCT                                  | SOM2                 |
| lacZ sense             | TCGAGAAAGGAGGTGAACTACTATGAAG<br>CTTGGC                | pTOM20c              |
| lacZ antisense         | TCGAGCCAAGCTTCATAGTAGTTCACCTC<br>CTTTC                | pTOM20c              |
| lacZ CGU sense         | TCGAGAAAGGAGGTGAACTACTATGCGT<br>CGTAAGCTTCGTCGTGGC    | pTOM21               |
| lacZ CGU antisense     | TCAGGCCACGACGAAGCTTACGACGCAT<br>AGTAGTTCACCTCCTTTC    | pTOM21               |
| lacZ CGC sense         | TCGAGAAAGGAGGTGAACTACTATGCGC<br>CGCAAGCTTCGCCGCGGC    | pTOM22               |
| lacZ CGC antisense     | TCGAGCCGCGGCGAAGCTTGCGGCGCAT<br>AGTAGTTCACCTCCTTTC    | pTOM22               |
| lacZ CGA sense         | TCGAGAAAGGAGGTGAACTACTAATGCG<br>ACGAAAGCTTCGACGAGGC   | pTOM23               |
| lacZ CGA antisense     | TCGAGCCTCGTCGAAGCTTTCGTCGCATA<br>GTAGTTCACCTCCTTTC    | pTOM23               |

|                      |                                                     |                                                          |
|----------------------|-----------------------------------------------------|----------------------------------------------------------|
| lacZ CGG sense       | TCGAGAAAGGAGGTGAACTACTATGCGG<br>CGGAAGCTTCGGCGGGG   | pTOM24                                                   |
| lacZ CGG antisense   | TCGAGCCCCGCCGAAGCTTCCGCCGCAT<br>AGTAGTTCACCTCCTTTC  | pTOM24                                                   |
| lacZ AGA sense       | TCGAGAAAGGAGGTGAACTACTAATGAG<br>AAGAAAGCTTAGAAGAGGC | pTOM25                                                   |
| lacZ AGA antisense   | TCGAGCCTCTTCTAAGCTTTCTTCTCATA<br>GTAGTTCACCTCCTTTC  | pTOM25                                                   |
| lacZ GCU sense       | TCGAGAAAGGAGGTGAACTACTAATGGC<br>TGCTAAGCTTGCTGCTGGC | pTOM26                                                   |
| lacZ GCU antisense   | TCGAGCCAGCAGCAAGCTTAGCAGCCAT<br>AGTAGTTCACCTCCTTTC  | pTOM26                                                   |
| RF sense (up)        | GGCTCGAGAAAGGTGGTGAAGTACTATG<br>ACCATGATTACG        | pKUB20,21,22,23,<br>24,25                                |
| RF sense (center)    | ATGACCATGATTACGCCACCGCGGTGTA<br>CATTTAGGGGGTCTCTT   | pKUB20,21,22,23,<br>24,25                                |
| RF CGU (down)        | GGCTCGAGCCACTAGTTGTACAGAGGAC<br>GAAGAGACCCCCTA      | pKUB20                                                   |
| RF CGC (down)        | GGCTCGAGCCACTAGTTGTACAGAGGGC<br>GAAGAGACCCCCTA      | pKUB21                                                   |
| RF CGA (down)        | GGCTCGAGCCACTAGTTGTACAGAGGTC<br>GAAGAGACCCCCTA      | pKUB22                                                   |
| RF CGG (down)        | GGCTCGAGCCACTAGTTGTACAGAGGCC<br>GAAGAGACCCCCTA      | pKUB23                                                   |
| RF UGA (down)        | GGCTCGAGCCACTAGTTGTACAGAGGTC<br>AAAGAGACCCCCTA      | pKUB24                                                   |
| RF no (nonframe)     | GGCTCGAGGCACTAGTTGTACAGAGGTC<br>AAGAGACCCCCTA       | pKUB25                                                   |
| Arg(I/ACG)5'-p       | GCGCCCGTAGCTCAATTG                                  | RT-PCR primers<br>for<br>tRNA <sup>Arg</sup> (I/ACG)     |
| Arg(I/ACG)RT-p       | CGAACCCCTAACCTTTTGATCC                              | RT-PCR primers<br>for<br>tRNA <sup>Arg</sup> (I/ACG)     |
| Arg(I/ACG)i-probe    | CGCGCCCGAGAGGAGTCGAACCCCTAAC<br>CT                  | Probe for<br>isolation of<br>tRNA <sup>Arg</sup> (I/ACG) |
| Arg(I/ACG)n-probe    | GCGCCCGAGAGGAGTCGAACCCCTA                           | Probe for<br>tRNA <sup>Arg</sup> (I/ACG)                 |
| trnQ-Arg(CCG)n-probe | GCGCTCGGAGGGATTCGAACCCCCG                           | Probe for<br>tRNA <sup>Arg</sup> (CCG)                   |
| Bs16S5'-p            | AACCAGAAAGCCACGGCTAA                                | qPCR primer for<br>16S rRNA                              |
| Bs16S3'-p            | GGACAACGCTTGCCACCTA                                 | qPCR primer for<br>16S rRNA                              |
| lacZ5'-p             | ATCAGGATATGTGGCGGATGA                               | qPCR primer for<br>lacZ                                  |
| lacZ3'-p             | TGATTTGTGTAGTCGGTTTATGCA                            | qPCR primer for<br>lacZ                                  |

**Table S2.** *B. subtilis* strains used in  $\beta$ -gal assay. Strains were used as follows: KUB11-KB32 for  $\beta$ -Galactosidase assay, KUB33-44 frameshift assay, and DFK1-2, SK149-150 for X-gal plate assay of *srfA* or *comK*-induced *lacZ* translation. All strains were constructed in this study.

| Strain | Genotype (characteristics)                                                                                                                      |
|--------|-------------------------------------------------------------------------------------------------------------------------------------------------|
| KUB11  | <i>aprE::Pspac-lacZ trpC2</i> (Wild-type with <i>lacZ</i> )                                                                                     |
| KUB12  | <i>aprE::Pspac-4×CGU-lacZ trpC2</i> (Wild-type with 4×CGU <i>lacZ</i> )                                                                         |
| KUB13  | <i>aprE::Pspac-4×CGC-lacZ trpC2</i> (Wild-type with 4×CGC <i>lacZ</i> )                                                                         |
| KUB14  | <i>aprE::Pspac-4×CGA-lacZ trpC2</i> (Wild-type with 4×CGA <i>lacZ</i> )                                                                         |
| KUB15  | <i>aprE::Pspac-4×CGG-lacZ trpC2</i> (Wild-type with 4×CGG <i>lacZ</i> )                                                                         |
| KUB16  | <i>aprE::Pspac-4×AGA-lacZ trpC2</i> (Wild-type with 4×AGA <i>lacZ</i> )                                                                         |
| KUB17  | <i>aprE::Pspac-4×AGA-lacZ trpC2</i> (Wild-type with 4×GCU <i>lacZ</i> )                                                                         |
| KUB18  | <i>aprE::Pspac-lacZ <math>\Delta yaaJ::cat trpC2</math> (<math>\Delta yaaJ</math> with <i>lacZ</i>)</i>                                         |
| KUB19  | <i>aprE::Pspac-4×GCU-lacZ <math>\Delta yaaJ::cat trpC2</math> (<math>\Delta yaaJ</math> with 4×GCU <i>lacZ</i>)</i>                             |
| KUB20  | <i>aprE::Pspac-4×GCC-lacZ <math>\Delta yaaJ::cat trpC2</math> (<math>\Delta yaaJ</math> with 4×GCC <i>lacZ</i>)</i>                             |
| KUB21  | <i>aprE::Pspac-4×GCA-lacZ <math>\Delta yaaJ::cat trpC2</math> (<math>\Delta yaaJ</math> with 4×GCA <i>lacZ</i>)</i>                             |
| KUB22  | <i>aprE::Pspac-4×GCG-lacZ <math>\Delta yaaJ::cat trpC2</math> (<math>\Delta yaaJ</math> with 4×GCG <i>lacZ</i>)</i>                             |
| KUB23  | <i>aprE::Pspac-4×GCG-lacZ <math>\Delta yaaJ::cat trpC2</math> (<math>\Delta yaaJ</math> with 4×AGA <i>lacZ</i>)</i>                             |
| KUB24  | <i>aprE::Pspac-4×GCG-lacZ <math>\Delta yaaJ::cat trpC2</math> (<math>\Delta yaaJ</math> with 4×GCU <i>lacZ</i>)</i>                             |
| KUB25  | <i>aprE::Pspac-lacZ trnQ-Arg(CCG)::cat trpC2 (<math>\Delta Arg</math>(CCG) with <i>lacZ</i>)</i>                                                |
| KUB26  | <i>aprE::Pspac-4×GCU-lacZ trnQ-Arg(CCG)::cat trpC2 (<math>\Delta Arg</math>(CCG) with 4×GCU <i>lacZ</i>)</i>                                    |
| KUB27  | <i>aprE::Pspac-4×GCC-lacZ trnQ-Arg(CCG)::cat trpC2 (<math>\Delta Arg</math>(CCG) with 4×GCC <i>lacZ</i>)</i>                                    |
| KUB28  | <i>aprE::Pspac-4×GCA-lacZ trnQ-Arg(CCG)::cat trpC2 (<math>\Delta Arg</math>(CCG) with 4×GCA <i>lacZ</i>)</i>                                    |
| KUB29  | <i>aprE::Pspac-4×GCG-lacZ trnQ-Arg(CCG)::cat trpC2 (<math>\Delta Arg</math>(CCG) with 4×GCG <i>lacZ</i>)</i>                                    |
| KUB30  | <i>aprE::Pspac-4×GCG-lacZ trnQ-Arg(CCG)::cat trpC2 (<math>\Delta Arg</math>(CCG) with 4×AGA <i>lacZ</i>)</i>                                    |
| KUB31  | <i>aprE::Pspac-4×GCG-lacZ trnQ-Arg(CCG)::cat trpC2 (<math>\Delta Arg</math>(CCG) with 4×GCU <i>lacZ</i>)</i>                                    |
| KUB32  | <i>aprE::Pspac-lacZ <math>\Delta yaaJ::tet\Delta trnQ-Arg</math>(CCG)::cat trpC2 (<math>\Delta yaaJ\Delta Arg</math>(CCG) with <i>lacZ</i>)</i> |
| KUB33  | <i>aprE::Pspac-CGUfs-lacZ trpC2</i> (Wild-type with CGU-at-fs- <i>lacZ</i> )                                                                    |
| KUB34  | <i>aprE::Pspac-CGCfs-lacZ trpC2</i> (Wild-type with CGC-at-fs- <i>lacZ</i> )                                                                    |
| KUB35  | <i>aprE::Pspac-CGAfs-lacZ trpC2</i> (Wild-type with 4×CGA-at-fs- <i>lacZ</i> )                                                                  |
| KUB36  | <i>aprE::Pspac-CGGfs-lacZ trpC2</i> (Wild-type with 4×CGG-at-fs- <i>lacZ</i> )                                                                  |
| KUB37  | <i>aprE::Pspac-AGAFs-lacZ trpC2</i> (Wild-type with 4×UGA-at-fs- <i>lacZ</i> )                                                                  |
| KUB38  | <i>aprE::Pspac-if-lacZ trpC2</i> (Wild-type with in-frame <i>lacZ</i> )                                                                         |
| KUB39  | <i>aprE::Pspac-CGUfs-lacZ <math>\Delta yaaJ::cat trpC2</math> (<math>\Delta yaaJ</math> with CGU-at-fs-<i>lacZ</i>)</i>                         |
| KUB40  | <i>aprE::Pspac-CGCfs-lacZ <math>\Delta yaaJ::cat trpC2</math> (<math>\Delta yaaJ</math> with CGC-at-fs-<i>lacZ</i>)</i>                         |
| KUB41  | <i>aprE::Pspac-CGAfs-lacZ <math>\Delta yaaJ::cat trpC2</math> (<math>\Delta yaaJ</math> with 4×CGA-at-fs-<i>lacZ</i>)</i>                       |
| KUB42  | <i>aprE::Pspac-CGGfs-lacZ <math>\Delta yaaJ::cat trpC2</math> (<math>\Delta yaaJ</math> with 4×CGG-at-fs-<i>lacZ</i>)</i>                       |
| KUB43  | <i>aprE::Pspac-AGAFs-lacZ <math>\Delta yaaJ::cat trpC2</math> (<math>\Delta yaaJ</math> with 4×UGA-at-fs-<i>lacZ</i>)</i>                       |
| KUB44  | <i>aprE::Pspac-if-lacZ <math>\Delta yaaJ::cat trpC2</math> (<math>\Delta yaaJ</math> with in-frame <i>lacZ</i>)</i>                             |
| DF1    | <i>amyE::srfA-lacZ trpC2</i> (Wild-type with <i>comK-lacZ</i> )                                                                                 |
| DF2    | <i>amyE::comK-lacZ trpC2</i> (Wild-type with <i>srfA-lacZ</i> )                                                                                 |
| SK149  | <i>amyE::srfA-lacZ <math>\Delta yaaJ::tet trpC2</math> (<math>\Delta yaaJ</math> with <i>srfA-lacZ</i>)</i>                                     |
| SK150  | <i>amyE::comK-lacZ <math>\Delta yaaJ::tet trpC2</math> (<math>\Delta yaaJ</math> with <i>comK-lacZ</i>)</i>                                     |

**Table S3.** Codon usage in *B. subtilis* and *E. coli*.

The number and relative synonymous codon usage (RSCU) of 6 arginine codons for all genes in *B. subtilis* and *E. coli* are shown [4]. RSCU is calculated as the ratio of the observed frequency of a codon to the expected frequency under the assumption of equal usage between synonymous codons for the same amino acids.

|       | <i>B. subtilis</i> 168 |       | <i>E. coli</i> K12 |       |
|-------|------------------------|-------|--------------------|-------|
| Codon | Count                  | RSCU  | Count              | RSCU  |
| CGU   | 9133                   | 1.091 | 28149              | 2.296 |
| CGC   | 10397                  | 1.241 | 29560              | 2.411 |
| CGA   | 4962                   | 0.592 | 4664               | 0.38  |
| CGG   | 7833                   | 0.935 | 7119               | 0.581 |
| AGA   | 13221                  | 1.579 | 2625               | 0.214 |
| AGG   | 4703                   | 0.562 | 1457               | 0.119 |

## References

1. Jühling, F.; Mörl, M.; Hartmann, R.K.; Sprinzl, M.; Stadler, P.F.; Pütz, J. tRNAdb 2009: Compilation of tRNA sequences and tRNA genes. *Nucleic Acids Res.* **2009**, *37*, D159–D162. doi: 10.1093/nar/gkn772.
2. Murayama, R.; Akanuma, G.; Makino, Y.; Nanamiya, H.; Kawamura, F. Spontaneous transformation and its use for genetic mapping in *Bacillus subtilis*. *Biosci. Biotechnol. Biochem.* **2004**, *68*, 1672–1680. doi: 10.1271/bbb.68.1672.
3. Kong, J. H.; Dubnau, D. The regulation of competence transcription factor synthesis constitutes a critical control point in the regulation of competence in *Bacillus subtilis*. *J. Bacteriol.* **1994**, *176*, 5753–5761. doi: 10.1128/jb.176.18.5753-5761.
4. Subramanian, K.; Payne, B.; Feyertag, F.; Alvarez-Ponce, D. The codon statistics database: A database of codon usage bias. *Mol. Biol. Evol.* **2022**, *39*, msac157. doi: 10.1093/molbev/msac157.
